# Supplementary material
Source: publisher figshare collection journal article supplement (https://gsajournals.figshare.com/ndownloader/files/15584201)
Supplement: Supplementary file 1 [file 15584201]

## Sheet: adult genes final table
File S2. Top SNPs (P<10e-05) associated with adult anoxia tolerance.																			Gene 1			Gene 2			Gene 3			Gene 4			Gene 5			Gene 6
SNP ID	MinorAllele	MajorAllele	RefAllele	MAF	Minor Allele Count	Major Allele Count	Female Effect size	Female Pval	Female Mixed Pval	Male Effect size	Male Pval	Male Mixed Pval	Average Effect size	Average Pval	Average Mixed Pval	Difference effect size	Difference Pval	Difference Mixed Pval	Flybase Gene ID	Gene Symbol	site class	Flybase Gene ID	Gene Symbol	site class	Flybase Gene ID	Gene Symbol	site class	Flybase Gene ID	Gene Symbol	site class	Flybase Gene ID	Gene Symbol	site class	Flybase Gene ID	Gene Symbol	site class
2L_12411861_SNP	G	A	A	0.15	24	136	-0.1134	0.0001101	0.000156	-0.03518	0.1411	0.151	-0.07429	0.00349	0.00452	-0.0782	2.43e-06	1.25e-06	FBgn0043841	vir-1	INTRON
2L_12649319_SNP	A	C	C	0.3185	50	107	-0.09732	1.4e-05	2.95e-05	-0.08111	4.86e-06	1.14e-05	-0.08921	2.92e-06	7.59e-06	-0.0162	0.2239	0.209	> 1 kb from gene
2L_12649334_SNP	G	A	A	0.3125	50	110	-0.09745	1.16e-05	2.68e-05	-0.07999	6.29e-06	1.39e-05	-0.08872	2.95e-06	7.81e-06	-0.01746	0.1857	0.173	> 1 kb from gene
2L_13146463_SNP	T	A	A	0.05521	9	154	-0.2071	3.23e-06	5.41e-06	-0.09999	0.007969	0.00791	-0.1536	9.2e-05	0.000119	-0.1072	2.05e-05	2.09e-05	FBgn0265088	CR44199	173 bp UPSTREAM
2L_13146894_SNP	A	G	G	0.06433	11	160	-0.1357	0.001278	0.00137	-0.03369	0.3327	0.329	-0.08471	0.02165	0.0224	-0.102	9.15e-06	7.85e-06	FBgn0265088	CR44199	EXON
2L_14011283_SNP	A	T	T	0.09938	16	145	-0.07215	0.04482	0.0399	0.01325	0.6487	0.65	-0.02945	0.3446	0.343	-0.0854	1.68e-05	9.71e-06	FBgn0028909	tRNA:Q:34E	647 bp UPSTREAM
2L_15328254_SNP	C	A	A	0.08982	15	152	-0.1135	0.002112	0.00235	-0.1331	7.08e-06	4.88e-06	-0.1233	0.000108	9.67e-05	0.0196	0.3427	0.336	> 1 kb from gene
2L_15476573_SNP	T	A	A	0.1918	28	118	-0.125	1.24e-05	6.38e-06	-0.1044	9.57e-06	3.91e-06	-0.1147	4.01e-06	1.67e-06	-0.02061	0.2119	0.192	FBgn0003448	sna	20 bp DOWNSTREAM
2L_15511601_SNP	T	C	C	0.05952	10	158	-0.1965	6.22e-06	7.31e-06	-0.1594	7.18e-06	5.58e-06	-0.178	2.37e-06	2.31e-06	-0.0371	0.1349	0.13	> 1 kb from gene
2L_16338482_SNP	C	G	G	0.1392	22	136	-0.1362	6.41e-06	7.06e-06	-0.09955	4.3e-05	6.4e-05	-0.1179	5.57e-06	8.01e-06	-0.0366	0.03826	0.0335	FBgn0259151	CG42266	SYNONYMOUS_CODING	FBgn0028899	CG31817	597 bp UPSTREAM
2L_16763609_SNP	T	C	C	0.06667	11	154	-0.1378	0.000943	0.00101	-0.03591	0.2873	0.299	-0.08685	0.01604	0.0176	-0.1019	1.34e-05	8.36e-06	> 1 kb from gene
2L_18342990_SNP	C	A	C	0.06875	11	149	-0.1866	7.06e-06	7.62e-06	-0.1501	5.59e-06	8.25e-06	-0.1684	2.2e-06	3.12e-06	-0.0365	0.1287	0.12	FBgn0000636	Fas3	INTRON
2L_18343001_SNP	G	T	G	0.07407	12	150	-0.1784	7.18e-06	8.38e-06	-0.1456	4.2e-06	6.62e-06	-0.162	1.95e-06	2.97e-06	-0.03283	0.1523	0.145	FBgn0000636	Fas3	INTRON
2L_18343004_SNP	A	G	A	0.07407	12	150	-0.1784	7.18e-06	8.38e-06	-0.1456	4.2e-06	6.62e-06	-0.162	1.95e-06	2.97e-06	-0.03283	0.1523	0.145	FBgn0000636	Fas3	INTRON
2L_18343061_SNP	A	T	A	0.07643	12	145	-0.1646	3.35e-05	4.5e-05	-0.14	1.14e-05	1.59e-05	-0.1523	7.91e-06	1.26e-05	-0.02459	0.2874	0.277	FBgn0000636	Fas3	INTRON
2L_18343087_SNP	C	A	C	0.075	12	148	-0.1768	8.87e-06	1.03e-05	-0.1446	5.23e-06	7.77e-06	-0.1607	2.44e-06	3.65e-06	-0.03223	0.1619	0.153	FBgn0000636	Fas3	INTRON
2L_1883431_SNP	A	G	G	0.06757	10	138	-0.1795	3.15e-05	4.64e-05	-0.146	2e-05	3.81e-05	-0.1627	9.98e-06	1.75e-05	-0.0335	0.1829	0.174	FBgn0031373	CG15358	INTRON
2L_1942706_SNP	G	A	A	0.05389	9	158	-0.1648	0.0003737	0.000292	-0.05182	0.176	0.172	-0.1083	0.007541	0.00651	-0.1129	9.66e-06	6.74e-06	FBgn0031374	CG7337	INTRON
2L_19817849_SNP	G	C	C	0.2199	31	110	-0.1227	3.56e-06	5.65e-06	-0.08268	0.0003529	0.000183	-0.1027	1.53e-05	1.25e-05	-0.03998	0.006534	0.00842	FBgn0263873	sick	INTRON
2L_19822561_SNP	T	C	T	0.2733	41	109	0.08839	0.0001979	0.00039	0.02435	0.203	0.23	0.05637	0.00572	0.00993	0.06404	4.67e-06	1.65e-06	FBgn0263873	sick	INTRON
2L_19823591_SNP	A	G	G	0.2597	40	114	-0.1107	4.63e-06	5.26e-06	-0.07899	5.61e-05	7.35e-05	-0.09484	5.1e-06	7.38e-06	-0.03171	0.02737	0.0211	FBgn0263873	sick	INTRON
2L_19949748_SNP	C	A	A	0.0875	14	146	-0.1494	7.97e-05	6.15e-05	-0.1379	6.88e-06	4.67e-06	-0.1436	1.13e-05	8.11e-06	-0.01155	0.5924	0.584	FBgn0263873	sick	INTRON
2L_2110345_INS	AG	A	A	0.05357	9	159	-0.12	0.009749	0.00998	-0.001615	0.9662	0.966	-0.06081	0.1334	0.137	-0.1184	3.05e-06	2.2e-06	FBgn0053516	dpr3	468 bp UPSTREAM
2L_2110352_DEL	T	TACTAT	TACTAT	0.05325	9	160	-0.1208	0.009248	0.00948	-0.002202	0.9538	0.954	-0.0615	0.1289	0.133	-0.1186	2.77e-06	2.1e-06	FBgn0053516	dpr3	475 bp UPSTREAM
2L_2110391_SNP	T	G	G	0.05882	10	160	-0.1438	0.001046	0.00121	-0.03325	0.3567	0.357	-0.08852	0.02087	0.0227	-0.1105	4.37e-06	3.48e-06	FBgn0053516	dpr3	513 bp UPSTREAM
2L_2110562_SNP	G	T	T	0.09259	15	147	-0.134	0.0002301	0.000243	-0.03556	0.2296	0.236	-0.08476	0.007246	0.00792	-0.09841	1.25e-06	5.97e-07	FBgn0053516	dpr3	684 bp UPSTREAM
2L_21752475_SNP	T	A	A	0.07692	12	144	-0.06331	0.1218	0.114	0.03903	0.2426	0.241	-0.01214	0.7331	0.716	-0.1023	5.56e-06	3.13e-06	FBgn0086779	step	INTRON
2L_21772523_SNP	A	C	C	0.05917	10	159	-0.09614	0.03067	0.0287	0.01353	0.7116	0.708	-0.04131	0.2885	0.28	-0.1097	4.86e-06	4.21e-06	FBgn0051612	CG31612	INTRON
2L_3227664_SNP	A	G	G	0.05769	9	147	-0.1049	0.02524	0.0219	0.01505	0.6886	0.693	-0.04494	0.2675	0.262	-0.12	2.36e-06	1.66e-06	> 1 kb from gene
2L_4232973_SNP	C	T	T	0.1697	28	137	-0.1103	8.46e-05	5.03e-05	-0.1064	2.05e-06	1.76e-06	-0.1084	7.17e-06	4.63e-06	-0.003971	0.8009	0.8	> 1 kb from gene
2L_4735795_SNP	T	C	C	0.3129	51	112	0.09637	1.63e-05	1.32e-05	0.0755	3.21e-05	3.63e-05	0.08594	8.49e-06	8.9e-06	0.02088	0.108	0.0998	FBgn0031627	CG15630	INTRON
2L_4895769_SNP	C	G	G	0.06024	10	156	-0.1906	9.5e-06	1.74e-05	-0.1579	4.72e-06	7.04e-06	-0.1742	2.4e-06	4.31e-06	-0.03275	0.19	0.182	FBgn0031645	CG3036	INTRON
2L_5034044_SNP	A	G	G	0.05882	10	160	-0.1658	0.0001606	0.000142	-0.05844	0.1082	0.105	-0.1121	0.003588	0.00341	-0.1074	8.02e-06	6.82e-06	FBgn0000299	Cg25C	SYNONYMOUS_CODING
2L_5409318_SNP	T	C	C	0.05917	10	159	-0.1979	5.57e-06	3.93e-06	-0.1127	0.001767	0.00156	-0.1553	4.67e-05	3.64e-05	-0.08519	0.0003853	0.000417	FBgn0016660	H15	INTRON
2L_7488869_SNP	A	G	G	0.05521	9	154	-0.1588	0.000574	0.000464	-0.04072	0.2812	0.284	-0.09977	0.01304	0.0124	-0.1181	3.6e-06	2.4e-06	FBgn0260486	CG42533	INTRON
2L_7488895_SNP	C	T	T	0.06098	10	154	-0.1478	0.0007489	0.000631	-0.0388	0.2794	0.283	-0.0933	0.01467	0.0141	-0.109	5.11e-06	4.95e-06	FBgn0260486	CG42533	INTRON
2L_7644880_SNP	A	T	T	0.09259	15	147	-0.1019	0.00634	0.00518	-0.01141	0.7086	0.704	-0.05665	0.08174	0.0774	-0.09049	8.66e-06	5.03e-06	FBgn0264087	Slob	INTRON
2L_8639637_DEL	T	TT	TT	0.0875	14	146	-0.164	7.96e-06	6.96e-06	-0.1006	0.0009507	0.000991	-0.1323	3.58e-05	3.72e-05	-0.06345	0.002832	0.0023	FBgn0011259	Sema-1a	INTRON
2L_9351534_SNP	T	C	T	0.09036	15	151	-0.1188	0.001248	0.00101	-0.1362	3.26e-06	2.85e-06	-0.1275	5.42e-05	4.39e-05	0.01733	0.4047	0.395	FBgn0032111	CG13110	538 bp DOWNSTREAM
2L_9399117_SNP	T	C	C	0.1159	19	145	-0.1097	0.0006922	0.00131	-0.1141	6.32e-06	1.48e-05	-0.1119	4.77e-05	9.98e-05	0.004372	0.8125	0.812	FBgn0085395	Shawl	INTRON
2L_9745584_SNP	C	T	T	0.4079	62	90	-0.0982	6.43e-06	1.14e-05	-0.04874	0.005133	0.00714	-0.07347	8.5e-05	0.000146	-0.04946	7.59e-05	4.66e-05	FBgn0028704	Nckx30C	INTRON
2R_10234349_SNP	A	G	G	0.05357	9	159	-0.1954	2.15e-05	2.31e-05	-0.1829	8.08e-07	6.1e-07	-0.1891	1.85e-06	1.68e-06	-0.01254	0.6326	0.627	FBgn0085408	Shroom	INTRON
2R_10247924_SNP	C	G	G	0.05917	10	159	-0.1645	0.0001697	0.000182	-0.1567	8.21e-06	8.15e-06	-0.1606	2.01e-05	2.11e-05	-0.00773	0.7562	0.753	FBgn0033927	CR10102	14 bp DOWNSTREAM	FBgn0033926	Arc1	125 bp UPSTREAM
2R_10248381_SNP	G	T	G	0.06803	10	137	-0.1644	0.0001468	0.000196	-0.1567	1.31e-05	9.1e-06	-0.1605	2.15e-05	2.33e-05	-0.0077	0.7579	0.755	FBgn0033927	CR10102	EXON	FBgn0033926	Arc1	582 bp UPSTREAM
2R_10248382_SNP	G	A	A	0.05696	9	149	-0.1892	5.52e-05	4.44e-05	-0.1796	2.4e-06	1.04e-06	-0.1844	5.45e-06	3.29e-06	-0.009572	0.7217	0.711	FBgn0033927	CR10102	EXON	FBgn0033926	Arc1	583 bp UPSTREAM
2R_10248390_SNP	C	A	A	0.06289	10	149	-0.1641	0.0002441	0.000207	-0.1571	1.58e-05	8.08e-06	-0.1606	3.38e-05	2.28e-05	-0.006993	0.7837	0.776	FBgn0033927	CR10102	EXON	FBgn0033926	Arc1	591 bp UPSTREAM
2R_10248391_SNP	T	A	A	0.06289	10	149	-0.1641	0.0002441	0.000207	-0.1571	1.58e-05	8.08e-06	-0.1606	3.38e-05	2.28e-05	-0.006993	0.7837	0.776	FBgn0033927	CR10102	EXON	FBgn0033926	Arc1	592 bp UPSTREAM
2R_10248396_SNP	A	G	G	0.05625	9	151	-0.1903	4.63e-05	3.95e-05	-0.1806	1.95e-06	8.92e-07	-0.1855	4.46e-06	2.85e-06	-0.009686	0.7165	0.708	FBgn0033927	CR10102	EXON	FBgn0033926	Arc1	597 bp UPSTREAM
2R_10248399_SNP	T	A	T	0.07194	10	129	-0.1668	0.000161	0.00016	-0.1581	1.21e-05	7.86e-06	-0.1624	2.4e-05	1.91e-05	-0.00869	0.723	0.725	FBgn0033927	CR10102	EXON	FBgn0033926	Arc1	600 bp UPSTREAM
2R_10248400_SNP	G	C	C	0.05625	9	151	-0.1903	4.63e-05	3.95e-05	-0.1806	1.95e-06	8.92e-07	-0.1855	4.46e-06	2.85e-06	-0.009686	0.7165	0.708	FBgn0033927	CR10102	EXON	FBgn0033926	Arc1	601 bp UPSTREAM
2R_11427061_SNP	T	A	A	0.2349	39	127	-0.07522	0.002199	0.00328	-0.01467	0.4647	0.47	-0.04495	0.03542	0.0424	-0.06055	9.25e-06	6.23e-06	FBgn0050467	CG30467	INTRON	FBgn0034027	CG8187	UTR_3_PRIME
2R_11427199_SNP	T	C	C	0.2229	37	129	-0.07129	0.004971	0.00639	-0.01007	0.6295	0.626	-0.04068	0.06693	0.0724	-0.06123	7.59e-06	7.35e-06	FBgn0050467	CG30467	SYNONYMOUS_CODING	FBgn0034027	CG8187	UTR_3_PRIME
2R_11605014_SNP	C	T	C	0.1429	23	138	-0.0996	0.001108	0.00116	-0.1166	1.65e-06	1.4e-06	-0.1081	3.72e-05	3.74e-05	0.01696	0.329	0.317	> 1 kb from gene
2R_14268593_SNP	A	G	G	0.08824	15	155	-0.1177	0.001295	0.00105	-0.02185	0.4699	0.466	-0.06977	0.02949	0.0269	-0.09585	1.45e-06	1.14e-06	FBgn0262838	CG43202	321 bp DOWNSTREAM
2R_14268709_SNP	A	C	C	0.05882	10	160	-0.141	0.001387	0.00122	-0.02692	0.4601	0.456	-0.08398	0.02974	0.0281	-0.1141	1.99e-06	1.58e-06	FBgn0262838	CG43202	205 bp DOWNSTREAM
2R_15327726_SNP	A	T	T	0.06832	11	150	-0.1449	0.0004648	0.000747	-0.15	4.53e-06	8.33e-06	-0.1475	2.93e-05	5.4e-05	0.005149	0.8316	0.827	FBgn0040273	Spt5	SYNONYMOUS_CODING
2R_15428222_SNP	C	G	G	0.07186	12	155	-0.1878	2.79e-06	1.68e-06	-0.1564	1.5e-06	1.11e-06	-0.1721	6.74e-07	4.44e-07	-0.03136	0.1719	0.164	FBgn0003435	sm	INTRON
2R_15695021_SNP	G	C	C	0.08383	14	153	-0.09013	0.01865	0.0151	0.005069	0.8719	0.87	-0.04253	0.2038	0.189	-0.0952	4.49e-06	3.05e-06	> 1 kb from gene
2R_15917259_SNP	G	C	C	0.05325	9	160	-0.237	1.58e-07	2.02e-07	-0.1312	0.0004902	0.000437	-0.1841	3.36e-06	3.5e-06	-0.1058	3.05e-05	2.64e-05	> 1 kb from gene
2R_17283386_INS	AA	A	A	0.156	22	119	-0.07288	0.02092	0.0206	0.002277	0.927	0.93	-0.0353	0.191	0.201	-0.07516	2.05e-05	9.91e-06	FBgn0010415	Sdc	INTRON
2R_17648986_INS	TTAACT	T	T	0.09146	15	149	-0.1336	0.0002832	0.000295	-0.04173	0.1728	0.164	-0.08767	0.006658	0.00647	-0.09187	5.45e-06	3.47e-06	> 1 kb from gene
2R_18070630_SNP	A	C	C	0.1098	18	146	-0.1513	4.31e-06	5.7e-06	-0.101	0.0001715	0.0002	-0.1262	1.04e-05	1.31e-05	-0.05034	0.006117	0.00691	FBgn0034707	MED16	22 bp UPSTREAM	FBgn0034705	CG11170	293 bp UPSTREAM	FBgn0034706	CG11275	483 bp DOWNSTREAM
2R_18070637_SNP	C	G	G	0.1091	18	147	-0.1497	6.15e-06	7.18e-06	-0.1013	0.0001576	0.000191	-0.1255	1.13e-05	1.45e-05	-0.04846	0.01101	0.00933	FBgn0034707	MED16	15 bp UPSTREAM	FBgn0034705	CG11170	300 bp UPSTREAM	FBgn0034706	CG11275	490 bp DOWNSTREAM
2R_18108684_SNP	A	T	T	0.103	17	148	-0.1473	7.97e-06	1.8e-05	-0.07002	0.009483	0.0129	-0.1087	0.0001418	0.000309	-0.07728	6.06e-05	4.1e-05	FBgn0034715	Oatp58Db	1 bp DOWNSTREAM	FBgn0050277	Oatp58Da	291 bp UPSTREAM
2R_18113287_SNP	G	C	C	0.06024	10	156	-0.2017	4.29e-06	5.3e-06	-0.1017	0.005275	0.00447	-0.1517	7.93e-05	7.93e-05	-0.1001	4.3e-05	3.01e-05	FBgn0034716	Oatp58Dc	INTRON
2R_18113297_SNP	G	A	A	0.06024	10	156	-0.2017	4.29e-06	5.3e-06	-0.1017	0.005275	0.00447	-0.1517	7.93e-05	7.93e-05	-0.1001	4.3e-05	3.01e-05	FBgn0034716	Oatp58Dc	INTRON
2R_18115162_SNP	G	C	G	0.3095	52	116	0.09632	1.5e-05	9.59e-06	0.0647	0.0003928	0.000371	0.08051	3.15e-05	2.6e-05	0.03162	0.01248	0.0112	FBgn0034716	Oatp58Dc	INTRON
2R_18120062_SNP	G	T	T	0.09146	15	149	-0.1719	1.01e-06	1.3e-06	-0.1071	0.0001975	0.000279	-0.1395	4.6e-06	7.4e-06	-0.06476	0.001577	0.00129	> 1 kb from gene
2R_18249384_SNP	A	G	G	0.05294	9	161	-0.1166	0.01208	0.00995	0.01978	0.602	0.602	-0.04839	0.2324	0.222	-0.1363	4.73e-08	3.47e-08	FBgn0034720	Liprin-gamma	INTRON
2R_18282385_SNP	A	T	T	0.2988	49	115	-0.1029	5.77e-06	4.89e-06	-0.07541	4.36e-05	4.45e-05	-0.08915	5.47e-06	5.66e-06	-0.02748	0.036	0.0314	FBgn0034724	babos	INTRON	FBgn0034723	CG13506	858 bp DOWNSTREAM
2R_19668129_SNP	T	A	A	0.09036	15	151	-0.1042	0.004967	0.00443	-0.009589	0.7538	0.749	-0.0569	0.08002	0.0748	-0.09462	1.98e-06	1.65e-06	FBgn0034903	CG9850	INTRON
2R_19668140_SNP	C	A	A	0.08434	14	152	-0.1208	0.001535	0.00123	-0.006154	0.8457	0.843	-0.0635	0.05818	0.0525	-0.1147	1.84e-08	1.14e-08	FBgn0034903	CG9850	INTRON
2R_19670737_SNP	A	G	G	0.1656	27	136	-0.08482	0.003015	0.00292	-0.01512	0.5181	0.517	-0.04997	0.04502	0.0448	-0.0697	8.07e-06	6.19e-06	FBgn0034903	CG9850	INTRON
2R_19671525_SNP	T	A	A	0.08383	14	153	-0.1222	0.001103	0.00105	-0.02856	0.3511	0.356	-0.07536	0.02074	0.0209	-0.09359	6.69e-06	4.58e-06	FBgn0034903	CG9850	INTRON
2R_20678697_SNP	C	G	G	0.1557	26	141	-0.08632	0.003025	0.00304	-0.01102	0.6465	0.642	-0.04867	0.0562	0.056	-0.0753	1.94e-06	1.29e-06	FBgn0015801	Reg-5	INTRON
2R_3907418_DEL	T	ACAA	ACAA	0.0596	9	142	-0.1756	0.0001007	0.000178	-0.1687	9.43e-06	5.14e-06	-0.1721	1.52e-05	1.68e-05	-0.006888	0.7862	0.79	> 1 kb from gene
2R_3907427_INS	TT	T	T	0.05442	8	139	-0.1953	5.06e-05	7.46e-05	-0.1746	1.77e-05	8.34e-06	-0.1849	1.38e-05	1.18e-05	-0.02064	0.4392	0.451	> 1 kb from gene
2R_4528112_SNP	A	C	C	0.08434	14	152	-0.1057	0.005798	0.00694	-0.1336	1.31e-05	9.05e-06	-0.1197	0.0002885	0.000275	0.0279	0.1928	0.184	> 1 kb from gene
2R_5302183_SNP	T	C	C	0.07879	13	152	-0.1437	0.0002681	0.000204	-0.04411	0.1774	0.168	-0.09392	0.006659	0.00566	-0.0996	3.28e-06	2.34e-06	FBgn0041087	wun2	UTR_5_PRIME
2R_6026294_SNP	T	C	C	0.05357	9	159	-0.1091	0.01877	0.0188	0.01393	0.7133	0.714	-0.0476	0.2395	0.242	-0.1231	1.1e-06	8.01e-07	FBgn0033490	CG12917	SYNONYMOUS_CODING	FBgn0263444	CR43467	473 bp DOWNSTREAM	FBgn0026388	Or46a	475 bp UPSTREAM
2R_6214866_SNP	A	G	G	0.05357	9	159	-0.2055	6.53e-06	5.62e-06	-0.1584	2.04e-05	1.87e-05	-0.182	4.08e-06	3.51e-06	-0.04713	0.07092	0.0667	FBgn0261698	SLO2	INTRON
2R_6230917_SNP	T	G	G	0.05556	9	153	-0.1067	0.02052	0.0266	-0.1601	9.39e-06	1.54e-05	-0.1334	0.000673	0.000972	0.05341	0.04311	0.0377	FBgn0261698	SLO2	INTRON
2R_6238885_SNP	A	G	G	0.1019	16	141	-0.09923	0.004593	0.00573	-0.1286	1.88e-06	5.95e-06	-0.1139	0.0001157	0.000212	0.02939	0.1494	0.138	FBgn0261698	SLO2	INTRON	FBgn0262836	CG43200	153 bp DOWNSTREAM	FBgn0262791	CG43172	153 bp DOWNSTREAM
2R_6239066_SNP	T	C	C	0.075	12	148	-0.1331	0.0008309	0.00121	-0.17	3.9e-08	1.04e-07	-0.1516	6.98e-06	1.35e-05	0.03696	0.111	0.101	FBgn0262836	CG43200	UTR_3_PRIME	FBgn0261698	SLO2	INTRON	FBgn0262791	CG43172	UTR_3_PRIME	FBgn0262790	CG43171	895 bp DOWNSTREAM	FBgn0262837	CG43201	895 bp DOWNSTREAM	FBgn0262807	CG43178	895 bp DOWNSTREAM
2R_6239121_SNP	T	C	C	0.06135	10	153	-0.108	0.01339	0.0178	-0.1556	5.52e-06	9.86e-06	-0.1318	0.0003933	0.0006	0.04752	0.05839	0.0521	FBgn0262836	CG43200	UTR_3_PRIME	FBgn0261698	SLO2	INTRON	FBgn0262791	CG43172	UTR_3_PRIME	FBgn0262790	CG43171	840 bp DOWNSTREAM	FBgn0262837	CG43201	840 bp DOWNSTREAM	FBgn0262807	CG43178	840 bp DOWNSTREAM
2R_6239480_SNP	A	G	G	0.06135	10	153	-0.108	0.01339	0.0178	-0.1556	5.52e-06	9.86e-06	-0.1318	0.0003933	0.0006	0.04752	0.05839	0.0521	FBgn0262836	CG43200	INTRON	FBgn0261698	SLO2	INTRON	FBgn0262791	CG43172	INTRON	FBgn0262790	CG43171	481 bp DOWNSTREAM	FBgn0262837	CG43201	481 bp DOWNSTREAM	FBgn0262807	CG43178	481 bp DOWNSTREAM
2R_6239777_SNP	T	A	A	0.06098	10	154	-0.1087	0.0127	0.017	-0.1559	5e-06	9.39e-06	-0.1323	0.0003649	0.000567	0.04716	0.05993	0.054	FBgn0261698	SLO2	INTRON	FBgn0262836	CG43200	111 bp UPSTREAM	FBgn0262791	CG43172	111 bp UPSTREAM	FBgn0262790	CG43171	184 bp DOWNSTREAM	FBgn0262837	CG43201	184 bp DOWNSTREAM	FBgn0262807	CG43178	184 bp DOWNSTREAM
2R_6243604_DEL	A	ACGAATTTACGCAG	ACGAATTTACGCAG	0.05556	9	153	-0.1053	0.02196	0.029	-0.161	7.82e-06	1.36e-05	-0.1332	0.0006662	0.000994	0.0557	0.035	0.0301	FBgn0261698	SLO2	INTRON	FBgn0261686	CG42733	71 bp DOWNSTREAM	FBgn0033512	CG12902	269 bp UPSTREAM	FBgn0263271	CG43397	269 bp UPSTREAM
2R_6246394_SNP	C	G	G	0.1595	26	137	-0.1286	5.61e-06	6.87e-06	-0.1207	7.64e-08	1.19e-07	-0.1246	2.54e-07	3.53e-07	-0.00791	0.6321	0.624	FBgn0261698	SLO2	INTRON
2R_6247716_SNP	G	C	C	0.06211	10	151	-0.1076	0.01413	0.0183	-0.1547	6.75e-06	1.12e-05	-0.1311	0.0004457	0.000642	0.04716	0.05962	0.0541	FBgn0261698	SLO2	INTRON	FBgn0263270	CG43396	2 bp UPSTREAM
2R_6254993_SNP	A	C	C	0.0559	9	152	-0.119	0.009998	0.013	-0.1615	8.22e-06	1.29e-05	-0.1402	0.0003607	0.00052	0.04249	0.1107	0.0991	FBgn0261698	SLO2	INTRON
2R_6528190_SNP	A	C	A	0.09202	15	148	-0.08547	0.01832	0.0179	0.004023	0.8909	0.894	-0.04072	0.194	0.196	-0.08949	1.06e-05	6.43e-06	FBgn0033538	CG11883	NON_SYNONYMOUS_CODING
2R_7837517_SNP	A	C	C	0.05988	10	157	-0.1469	0.0008778	0.00148	-0.03376	0.3524	0.35	-0.09031	0.01919	0.0233	-0.1131	2.92e-06	2.01e-06	FBgn0033668	CG13188	INTRON
2R_7838639_SNP	C	T	T	0.05389	9	158	-0.1495	0.001264	0.00188	-0.02826	0.4586	0.457	-0.0889	0.02821	0.0329	-0.1213	1.8e-06	1.19e-06	FBgn0033668	CG13188	INTRON
3L_10392776_SNP	T	C	C	0.05325	9	160	-0.1593	0.0005971	0.00045	-0.1882	3.6e-07	2.66e-07	-0.1738	1.32e-05	9.51e-06	0.02891	0.267	0.262	> 1 kb from gene
3L_10399309_SNP	T	A	A	0.05848	10	161	-0.1337	0.002444	0.00188	-0.1581	7.74e-06	6.63e-06	-0.1459	0.0001244	9.54e-05	0.02441	0.3234	0.32	> 1 kb from gene
3L_10399512_SNP	G	A	A	0.05263	9	162	-0.1476	0.001435	0.00105	-0.176	1.99e-06	1.67e-06	-0.1618	4.92e-05	3.64e-05	0.02839	0.2742	0.271	> 1 kb from gene
3L_10729290_SNP	A	C	C	0.05389	9	158	-0.1782	0.0001149	6.96e-05	-0.1791	1.39e-06	1.09e-06	-0.1786	7.12e-06	4.68e-06	0.0008175	0.9752	0.975	> 1 kb from gene
3L_11440563_SNP	C	T	T	0.1548	24	131	-0.112	0.0001449	0.000146	-0.03637	0.1349	0.138	-0.07419	0.003936	0.0042	-0.07564	4.72e-06	3.11e-06	FBgn0036159	CG7557	884 bp DOWNSTREAM
3L_11440571_SNP	C	G	G	0.1288	21	142	-0.1252	8.03e-05	5.47e-05	-0.04006	0.1288	0.121	-0.08262	0.003067	0.00245	-0.08511	6.53e-07	5.54e-07	FBgn0036159	CG7557	892 bp DOWNSTREAM
3L_11535640_DEL	T	TGCTGCT	TGCTGCT	0.08696	14	147	-0.09581	0.01251	0.0118	-0.003728	0.905	0.904	-0.04977	0.1362	0.136	-0.09208	9.11e-06	6.91e-06	FBgn0259481	Mob2	CODON_DELETION
3L_12013118_SNP	T	C	T	0.2048	34	132	-0.09011	0.0004448	0.000506	-0.103	3.76e-07	5.58e-07	-0.09654	1.06e-05	1.37e-05	0.01287	0.3828	0.374	FBgn0041096	rols	INTRON
3L_12234376_INS	CATC	C	C	0.0875	14	146	-0.1159	0.002218	0.00231	-0.01834	0.5536	0.554	-0.06713	0.04197	0.0438	-0.09757	2.64e-06	1.74e-06	FBgn0260941	app	INTRON
3L_12453509_SNP	T	C	T	0.09639	16	150	-0.1386	9.75e-05	5.25e-05	-0.1261	1.13e-05	8.68e-06	-0.1323	1.65e-05	9.22e-06	-0.01248	0.5338	0.529	> 1 kb from gene
3L_1263742_SNP	G	A	A	0.07101	12	157	-0.1979	6.38e-07	6.34e-07	-0.1137	0.0005713	0.000495	-0.1558	7.47e-06	6.55e-06	-0.08423	0.0001674	0.000139	FBgn0035199	CG9134	INTRON
3L_13463425_SNP	C	T	T	0.2096	35	132	-0.1238	1.07e-06	9.25e-07	-0.0654	0.001985	0.00166	-0.0946	2.13e-05	1.78e-05	-0.05842	3.89e-05	2.92e-05	FBgn0036369	CG10089	INTRON
3L_14271107_SNP	T	C	T	0.3193	53	113	-0.08571	0.0001456	0.000126	-0.07935	1.42e-05	9.86e-06	-0.08253	2.38e-05	1.86e-05	-0.006361	0.6163	0.612	FBgn0001085	fz	INTRON
3L_15141070_SNP	T	G	T	0.4422	65	82	0.07998	0.0005443	0.000269	0.0214	0.2642	0.244	0.05069	0.01236	0.00845	0.05858	4.37e-06	1.3e-06	FBgn0036485	FucTA	INTRON
3L_16206905_SNP	T	G	G	0.06433	11	160	-0.2002	1.28e-06	5.18e-07	-0.1437	2.29e-05	1.99e-05	-0.1719	1.73e-06	9.4e-07	-0.05656	0.01595	0.0152	FBgn0036577	CG13073	NON_SYNONYMOUS_CODING	FBgn0264483	CR43891	123 bp UPSTREAM
3L_16726098_SNP	G	A	A	0.3226	50	105	0.09982	6.71e-06	1.09e-05	0.06724	0.0002556	0.000325	0.08353	1.5e-05	2.35e-05	0.03258	0.01249	0.0111	FBgn0036659	CG9701	548 bp UPSTREAM
3L_17254041_SNP	G	A	A	0.05422	9	157	-0.1986	1.67e-05	8.54e-06	-0.09633	0.01164	0.0105	-0.1474	0.0002584	0.000177	-0.1022	6.59e-05	5.09e-05	FBgn0264462	CR43870	INTRON	FBgn0264466	CR43874	491 bp DOWNSTREAM
3L_17257979_SNP	A	G	G	0.06707	11	153	-0.1961	2.35e-06	1.81e-06	-0.109	0.001583	0.0014	-0.1525	2.68e-05	2.23e-05	-0.08706	0.0002181	0.000159	FBgn0036705	CG13723	UTR_3_PRIME	FBgn0264462	CR43870	589 bp DOWNSTREAM
3L_17259288_SNP	T	G	G	0.118	19	142	-0.1434	1.13e-05	1.46e-05	-0.1174	1.25e-05	8.2e-06	-0.1304	4.52e-06	4.21e-06	-0.02597	0.1612	0.157	> 1 kb from gene
3L_17993103_SNP	A	C	C	0.05422	9	157	-0.1571	0.000771	0.000652	-0.04307	0.2648	0.256	-0.1001	0.01449	0.0128	-0.114	7.07e-06	5.47e-06	FBgn0000568	Eip75B	INTRON
3L_19151819_SNP	C	T	T	0.3742	58	97	-0.1036	5.83e-06	2.17e-06	-0.06951	0.0001765	0.000114	-0.08658	1.26e-05	5.38e-06	-0.03413	0.007126	0.00582	FBgn0016797	fz2	INTRON
3L_2016421_SNP	G	A	A	0.08284	14	155	-0.1573	2.74e-05	2.17e-05	-0.1273	2.61e-05	2.46e-05	-0.1423	1.14e-05	9.45e-06	-0.03003	0.1531	0.152	> 1 kb from gene
3L_21409054_SNP	G	A	A	0.05229	8	145	-0.1981	3.79e-05	5.48e-05	-0.07466	0.05838	0.0625	-0.1364	0.001129	0.00147	-0.1235	4.17e-06	3.28e-06	FBgn0261258	rgn	INTRON
3L_2868603_DEL	G	AC	AC	0.05357	9	159	-0.2023	1.05e-05	9.1e-06	-0.1346	0.0002968	0.000306	-0.1685	2.31e-05	2.17e-05	-0.0677	0.007846	0.00811	FBgn0263392	CG43444	INTRON
3L_3911026_SNP	T	G	G	0.2708	39	105	-0.1119	5.29e-06	7.08e-06	-0.07389	0.0003948	0.000294	-0.09291	1.9e-05	1.84e-05	-0.03804	0.005872	0.00653	FBgn0004910	Eip63F-1	664 bp DOWNSTREAM
3L_4630706_SNP	A	G	G	0.2695	45	122	-0.1048	7.34e-06	5.36e-06	-0.0815	1.75e-05	1.5e-05	-0.09317	4.12e-06	3.11e-06	-0.02333	0.07869	0.0746	FBgn0262870	axo	INTRON
3L_5274828_SNP	T	C	T	0.1576	26	139	-0.1269	9.76e-06	7.56e-06	-0.08262	0.0004622	0.000385	-0.1048	2.73e-05	2.34e-05	-0.04428	0.006596	0.00544	> 1 kb from gene
3L_5810978_INS	ACAT	A	A	0.1296	21	141	-0.1159	0.000243	0.000234	-0.03467	0.1762	0.18	-0.07528	0.006101	0.00635	-0.08123	2.22e-06	1.94e-06	FBgn0003984	vn	INTRON
3L_6632797_SNP	C	A	C	0.2242	37	128	-0.1048	2.27e-05	2.31e-05	-0.08986	7.09e-06	7.91e-06	-0.09734	5.01e-06	5.95e-06	-0.01495	0.2967	0.287	> 1 kb from gene
3L_6632851_SNP	T	C	T	0.2795	45	116	-0.09073	6.95e-05	0.000124	-0.09114	1.13e-06	1.3e-06	-0.09093	4.29e-06	7.6e-06	0.0004115	0.9753	0.975	> 1 kb from gene
3L_6812801_SNP	C	G	G	0.05294	9	161	-0.2275	5.25e-07	2.8e-07	-0.1275	0.0007091	0.00064	-0.1775	7.72e-06	5.16e-06	-0.09997	8.82e-05	7.48e-05	> 1 kb from gene
3L_7863930_DEL	A	ATTTGCCAGCAAA	ATTTGCCAGCAAA	0.07647	13	157	-0.1808	2.6e-06	1.94e-06	-0.1443	4.07e-06	3.31e-06	-0.1625	1.07e-06	8.3e-07	-0.0365	0.095	0.0921	FBgn0052365	CG32365	INTRON
3L_7864044_SNP	G	T	T	0.07879	13	152	-0.1815	2.63e-06	1.81e-06	-0.1454	3.49e-06	2.83e-06	-0.1634	9.86e-07	7.36e-07	-0.03607	0.1025	0.0964	FBgn0052365	CG32365	INTRON
3L_7864091_SNP	A	G	G	0.08485	14	151	-0.1607	1.52e-05	1.43e-05	-0.1299	1.54e-05	1.66e-05	-0.1453	5.78e-06	6.12e-06	-0.03078	0.1499	0.143	FBgn0052365	CG32365	INTRON
3L_7864099_SNP	T	C	C	0.07879	13	152	-0.1794	3e-06	2.43e-06	-0.1447	3.72e-06	3.2e-06	-0.1621	1.08e-06	9.31e-07	-0.03478	0.1155	0.109	FBgn0052365	CG32365	INTRON
3L_7864132_SNP	C	G	G	0.08125	13	147	-0.1732	9.11e-06	5.77e-06	-0.1408	8.9e-06	6.24e-06	-0.157	3.26e-06	2.18e-06	-0.03246	0.1481	0.135	FBgn0052365	CG32365	INTRON
3L_7864291_SNP	C	T	T	0.08333	12	132	-0.1909	1.12e-06	1.36e-06	-0.164	8.5e-07	3.56e-07	-0.1774	2.85e-07	2.26e-07	-0.02687	0.2349	0.236	FBgn0052365	CG32365	INTRON
3L_7864312_SNP	A	G	G	0.08609	13	138	-0.1971	1.8e-07	2.08e-07	-0.1573	7.14e-07	3.89e-07	-0.1772	8.47e-08	7.5e-08	-0.03978	0.07181	0.0676	FBgn0052365	CG32365	INTRON
3L_7864317_SNP	C	T	T	0.08442	13	141	-0.198	1.38e-07	1.77e-07	-0.1578	5.36e-07	3.47e-07	-0.1779	6.29e-08	6.42e-08	-0.04023	0.06678	0.0643	FBgn0052365	CG32365	INTRON
3L_7864329_INS	TATA	G	G	0.0828	13	144	-0.1962	1.49e-07	2.27e-07	-0.1578	4.27e-07	3.4e-07	-0.177	5.66e-08	7.36e-08	-0.03843	0.08097	0.0771	FBgn0052365	CG32365	INTRON
3L_7864332_SNP	T	G	G	0.08442	13	141	-0.1904	6.8e-07	5.51e-07	-0.1533	1.71e-06	7.89e-07	-0.1718	2.96e-07	1.91e-07	-0.03711	0.0952	0.0881	FBgn0052365	CG32365	INTRON
3L_7864334_INS	AA	G	G	0.08228	13	145	-0.1936	3.87e-07	3.31e-07	-0.1557	1e-06	4.93e-07	-0.1747	1.65e-07	1.11e-07	-0.03794	0.08457	0.0808	FBgn0052365	CG32365	INTRON
3L_8872970_SNP	A	C	C	0.05325	9	160	-0.1047	0.02568	0.0227	0.01621	0.6735	0.67	-0.04424	0.2805	0.268	-0.1209	1.74e-06	1.29e-06	FBgn0263930	dally	INTRON
3L_8873815_SNP	T	A	A	0.05294	9	161	-0.1318	0.00462	0.0038	-0.01609	0.6747	0.672	-0.07394	0.06938	0.0639	-0.1157	4.7e-06	3.82e-06	FBgn0263930	dally	INTRON
3L_9044078_SNP	C	T	T	0.1377	23	144	-0.1094	0.0003227	0.000259	-0.1071	1.35e-05	9.79e-06	-0.1082	3.85e-05	2.92e-05	-0.002326	0.8924	0.891	FBgn0000116	Argk	INTRON
3L_9287379_SNP	C	A	A	0.08333	14	154	-0.168	6.44e-06	5.41e-06	-0.119	8.97e-05	8.53e-05	-0.1435	8.88e-06	7.37e-06	-0.04906	0.02022	0.0188	> 1 kb from gene
3L_9328875_SNP	A	G	G	0.3804	62	101	-0.04862	0.02862	0.0276	0.009332	0.6092	0.602	-0.01964	0.3121	0.311	-0.05795	1.21e-06	8.03e-07	FBgn0035975	PGRP-LA	INTRON
3L_9510319_SNP	T	C	C	0.3415	56	108	-0.05277	0.02053	0.0205	0.006477	0.7288	0.723	-0.02315	0.245	0.248	-0.05925	1.27e-06	7.66e-07	FBgn0053700	CG33700	INTRON
3L_9832541_SNP	C	A	C	0.05325	9	160	-0.1539	0.0009215	0.000944	-0.03346	0.3797	0.378	-0.09367	0.02092	0.0211	-0.1204	1.76e-06	1.42e-06	FBgn0004390	Gap1	245 bp DOWNSTREAM	FBgn0015618	Cdk8	750 bp UPSTREAM
3R_10496188_SNP	T	C	C	0.1198	20	147	-0.103	0.001539	0.00146	-0.01934	0.4712	0.464	-0.06117	0.03184	0.0301	-0.08365	1.88e-06	1.48e-06	FBgn0265140	Meltrin	INTRON
3R_10498708_SNP	A	G	G	0.1152	19	146	-0.1155	0.0005062	0.000469	-0.03644	0.1853	0.177	-0.07597	0.00907	0.00838	-0.07906	1.33e-05	9.71e-06	FBgn0265140	Meltrin	INTRON
3R_10498795_SNP	C	A	A	0.1852	30	132	-0.06622	0.01805	0.0156	0.0001696	0.9941	0.994	-0.03302	0.1781	0.167	-0.06639	8.38e-06	7.39e-06	FBgn0265140	Meltrin	INTRON
3R_10501977_SNP	C	T	T	0.1961	30	123	-0.08746	0.001975	0.00129	-0.02029	0.3852	0.368	-0.05387	0.02946	0.0238	-0.06717	1.5e-05	6.6e-06	FBgn0265140	Meltrin	INTRON
3R_12509823_SNP	A	G	G	0.1429	23	138	-0.1023	0.00047	0.000911	-0.1052	7.12e-06	1.51e-05	-0.1038	3.45e-05	7.93e-05	0.002881	0.8677	0.865	FBgn0003944	Ubx	INTRON
3R_13172114_SNP	C	G	G	0.2375	38	122	-0.09021	0.0002759	0.000302	-0.02867	0.1731	0.163	-0.05944	0.006896	0.00642	-0.06155	4.52e-06	5.99e-06	FBgn0038498	beat-IIa	INTRON
3R_13788646_INS	TT	T	T	0.1758	29	136	-0.123	7.61e-06	7.83e-06	-0.09385	3.35e-05	2.17e-05	-0.1084	6.07e-06	4.72e-06	-0.02919	0.05759	0.057	FBgn0263995	cpo	INTRON
3R_13788653_SNP	C	A	A	0.1818	30	135	-0.1177	1.48e-05	1.38e-05	-0.09414	2.4e-05	1.56e-05	-0.1059	7.49e-06	5.62e-06	-0.0236	0.1219	0.12	FBgn0263995	cpo	INTRON
3R_16686228_SNP	A	T	T	0.1509	24	135	-0.1138	0.0001973	0.000126	-0.1146	2.57e-06	1.42e-06	-0.1142	1.43e-05	7.68e-06	0.0007473	0.9648	0.964	FBgn0038837	CG3822	UTR_3_PRIME	FBgn0259215	Ir93a	561 bp UPSTREAM
3R_17879093_DEL	G	GTCTCCGGCCCCCGGAA	GTCTCCGGCCCCCGGAA	0.06098	10	154	-0.2057	1.6e-06	2.36e-06	-0.124	0.0004773	0.000489	-0.1648	1.07e-05	1.35e-05	-0.08166	0.0007509	0.000739	FBgn0264491	how	INTRON
3R_22681139_SNP	A	C	C	0.08589	14	149	-0.1124	0.003552	0.00288	-0.1373	8.85e-06	5.03e-06	-0.1249	0.0001731	0.000118	0.02489	0.2465	0.237	FBgn0051072	Lerp	INTRON
3R_24761638_SNP	T	G	G	0.05422	9	157	-0.1583	0.0006717	0.000528	-0.1696	6.19e-06	4.22e-06	-0.164	4.51e-05	3.21e-05	0.01131	0.6664	0.661	FBgn0039617	CG14521	INTRON
3R_2504451_SNP	C	T	T	0.05325	9	160	-0.1705	0.0001879	0.000174	-0.1664	7.28e-06	6.45e-06	-0.1685	2.03e-05	1.84e-05	-0.004033	0.8763	0.876	FBgn0002522	lab	139 bp UPSTREAM
3R_25498044_INS	AA	A	A	0.08451	12	130	-0.09867	0.01654	0.0155	0.01421	0.6744	0.671	-0.04223	0.2413	0.232	-0.1129	2.57e-07	2.51e-07	FBgn0039678	Obp99a	38 bp DOWNSTREAM	FBgn0039679	ppk19	133 bp UPSTREAM	FBgn0039677	ppk30	845 bp DOWNSTREAM
3R_26009326_SNP	C	G	G	0.2208	34	120	-0.1031	0.0001061	6.24e-05	-0.0942	1.26e-05	6.74e-06	-0.09864	1.84e-05	9.88e-06	-0.008875	0.5527	0.544	FBgn0265202	CR44262	241 bp DOWNSTREAM
3R_3541923_INS	ATGA	C	C	0.3831	59	95	-0.07692	0.0003211	0.000787	-0.07807	7.2e-06	1.27e-05	-0.07749	2.82e-05	6.71e-05	0.001153	0.9248	0.926	> 1 kb from gene
3R_5552879_SNP	G	A	A	0.05031	8	151	-0.2273	3.76e-06	3.78e-06	-0.1764	1.07e-05	6.36e-06	-0.2018	2.15e-06	1.56e-06	-0.0509	0.06944	0.0614	FBgn0262477	FoxP	INTRON
3R_5556733_DEL	T	TTT	TTT	0.05063	8	150	-0.2229	4e-06	5.05e-06	-0.1725	1.71e-05	1.05e-05	-0.1977	3.02e-06	2.4e-06	-0.05047	0.06003	0.0637	FBgn0003886	alphaTub85E	209 bp DOWNSTREAM
3R_5595395_DEL	C	CC	CC	0.0625	10	150	-0.199	6.59e-06	5.2e-06	-0.135	0.0001833	0.000142	-0.167	1.33e-05	9.73e-06	-0.06404	0.01027	0.00861	FBgn0037747	CG8481	UTR_3_PRIME	FBgn0024330	MED6	690 bp UPSTREAM	FBgn0037749	CG9471	858 bp DOWNSTREAM
3R_7199800_SNP	T	G	G	0.05031	8	151	-0.2173	7.19e-06	7.1e-06	-0.1247	0.002389	0.00167	-0.171	6.75e-05	4.79e-05	-0.09261	0.0004452	0.000571	FBgn0004595	pros	NON_SYNONYMOUS_CODING
3R_9824490_SNP	C	G	G	0.08176	13	146	-0.1864	2.1e-06	9.43e-07	-0.1296	6.03e-05	3.5e-05	-0.158	4.02e-06	1.75e-06	-0.0568	0.009379	0.00855	FBgn0264493	rdx	INTRON
3R_9931835_SNP	A	G	G	0.2138	34	125	-0.1128	6.3e-06	1.5e-05	-0.05665	0.007134	0.00763	-0.08474	0.00012	0.000175	-0.05617	5.44e-05	8.16e-05	FBgn0038202	CG12402	INTRON
4_369816_SNP	T	A	A	0.4151	66	93	0.09135	3.09e-05	1.98e-05	0.03833	0.03564	0.0306	0.06484	0.0007502	0.000538	0.05302	1.21e-05	6.82e-06	FBgn0259214	PMCA	INTRON
X_13795264_SNP	A	C	C	0.08759	12	125	-0.1466	0.0002049	0.000332	-0.04527	0.1801	0.176	-0.09591	0.006582	0.00718	-0.1013	6.28e-07	4.58e-06	FBgn0264981	mamo	INTRON
X_15447133_SNP	A	T	T	0.06832	11	150	-0.1147	0.005703	0.00695	-0.0155	0.6544	0.655	-0.06509	0.07478	0.0785	-0.09918	9.43e-06	1.51e-05	FBgn0022710	Ac13E	INTRON
X_18093522_SNP	T	C	C	0.1585	26	138	-0.09432	0.001147	0.00127	-0.1171	3.77e-07	2.93e-07	-0.1057	2.17e-05	2.11e-05	0.02276	0.1639	0.157	FBgn0083228	Frq2	INTRON
X_18314221_SNP	A	G	G	0.05917	10	159	-0.1108	0.01136	0.011	0.001477	0.9671	0.967	-0.05465	0.1515	0.154	-0.1123	3.14e-06	2.4e-06	> 1 kb from gene
X_18983957_SNP	T	G	G	0.1325	22	144	-0.08112	0.009091	0.00631	-0.005748	0.8221	0.821	-0.04344	0.1101	0.0953	-0.07538	8.06e-06	6.87e-06	> 1 kb from gene
X_18983994_SNP	C	T	T	0.128	21	143	-0.08167	0.01074	0.00662	0.01004	0.6999	0.698	-0.03581	0.1998	0.172	-0.09171	6.1e-08	5.58e-08	> 1 kb from gene
X_19002586_DEL	A	AC	AC	0.1358	22	140	-0.1393	6.67e-06	5.18e-06	-0.07541	0.003342	0.00267	-0.1074	7.34e-05	5.72e-05	-0.06391	0.0002345	0.000161	> 1 kb from gene
X_19300067_SNP	A	G	G	0.1871	32	139	-0.08777	0.0009194	0.000816	-0.09573	6.74e-06	5.77e-06	-0.09175	5.87e-05	5.32e-05	0.007965	0.5926	0.59	FBgn0031016	kek5	INTRON
X_19300089_SNP	A	T	T	0.1871	32	139	-0.08777	0.0009194	0.000816	-0.09573	6.74e-06	5.77e-06	-0.09175	5.87e-05	5.32e-05	0.007965	0.5926	0.59	FBgn0031016	kek5	INTRON
X_2098067_SNP	T	A	A	0.4702	79	89	0.0476	0.02427	0.027	-0.003438	0.8436	0.841	0.02208	0.2332	0.243	0.05104	6.44e-06	6.47e-06	FBgn0023549	Mct1	INTRON	FBgn0023550	CG18031	206 bp UPSTREAM
X_21928716_DEL	A	CAAT	CAAT	0.05389	9	158	-0.1954	1.6e-05	1.22e-05	-0.1778	1.42e-06	1.31e-06	-0.1866	1.9e-06	1.59e-06	-0.01759	0.5005	0.496	FBgn0031195	CG17600	INTRON
X_2458133_SNP	C	T	T	0.08235	14	156	-0.1566	2.87e-05	2.57e-05	-0.141	3.18e-06	2.55e-06	-0.1488	4.2e-06	3.38e-06	-0.0156	0.4624	0.458	FBgn0260753	Pdfr	INTRON
X_4665721_SNP	G	A	A	0.4083	69	100	0.05273	0.01283	0.0129	-0.0004513	0.9793	0.979	0.02614	0.1578	0.158	0.05318	3.29e-06	3.31e-06	FBgn0025679	Bteb2	100 bp UPSTREAM
X_9602370_SNP	T	C	T	0.06471	11	159	-0.08949	0.03566	0.0365	0.01673	0.6314	0.628	-0.03638	0.3279	0.333	-0.1062	3.92e-06	3.11e-06	> 1 kb from gene
